# Supplementary material for: Crystal engineering with copper and melamine
Source: Royal Society of Chemistry journal article supplement (doi:10.1039/d1ra02903g), 2021-01-01
Supplement: d1ra02903g2.pdf [file d1ra02903g2.pdf]

## Electronic Supplementary Information 2

### Crystal engineering with copper and melamine

Ignacio Bernabé Vírseda,<sup>a</sup> Shiraz Ahmed Siddiqui,<sup>b</sup> Alexander Prado-Roller,<sup>c</sup>  
Michael Eisterer,<sup>d</sup> Hidetsugu Shiozawa<sup>\*a,b</sup>

<sup>a</sup> J. Heyrovsky Institute of Physical Chemistry, Czech Academy of Sciences, Dolejskova 3, 182 23 Prague 8, Czech Republic. Tel: +420-26605-3755; E-mail: hide.shiozawa@jh-inst.cas.cz

<sup>b</sup> Faculty of Physics, University of Vienna, Boltzmanngasse 5, 1090 Vienna, Austria. Fax: +43-1-4277-9726; Tel: +43-1-4277-72601; E-mail: hidetsugu.shiozawa@univie.ac.at

<sup>c</sup> Institute of Inorganic Chemistry, Faculty of Chemistry, University of Vienna, Währinger Straße 42, Austria

<sup>d</sup> Atominstitut, TU Wien, Stadionallee 2, 1020 Vienna, Austria

### X-ray Analysis

The X-ray intensity data were measured on Bruker D8 Venture diffractometer equipped with multilayer monochromator, Mo K/α INCOATEC micro focus sealed tube and Oxford cooling system. The structures were solved by *Direct Methods and Intrinsic Phasing*. Non-hydrogen atoms were refined with *anisotropic displacement parameters*. Hydrogen atoms were inserted at calculated positions and refined with riding model. The following software was used: *Bruker SAINT software package*<sup>i</sup> using a narrow-frame algorithm for frame integration, *SADABS*<sup>ii</sup> for absorption correction, *OLEX2*<sup>iii</sup> for structure solution, refinement, molecular diagrams and graphical user-interface, *Shelxle*<sup>iv</sup> for refinement and graphical user-interface *SHELXS-2015*<sup>v</sup> for structure solution, *SHELXL-2015*<sup>vi</sup> for refinement, *Platon*<sup>vii</sup> for symmetry check. Experimental data and CCDC-Codes Experimental data (Available online: <http://www.ccdc.cam.ac.uk/conts/retrieving.html>) can be found in Table 1. Crystal data, data collection parameters, and structure refinement details are given in Tables 2 to 5. Table 6 illuminates the trigonal bipyramid to square pyramid range of the compounds and selected data. Asymmetric Unit and packing views visualized in Figures 1 to 5.

**Table 1** Experimental parameter and CCDC-Code.

| Sample       | Machine | Source | Temp. | Detector Distance | Time/ Frame | #Frames | Frame width | CCDC    |
|--------------|---------|--------|-------|-------------------|-------------|---------|-------------|---------|
|              | Bruker  |        | [K]   | [mm]              | [s]         |         | [°]         |         |
| <b>Cu4M1</b> | D8      | Mo     | 100   | 50                | 1           | 835     | 0.360       | 2061869 |
| <b>Cu2M1</b> | D8      | Mo     | 100   | 40                | 5           | 1683    | 0.360       | 2061868 |

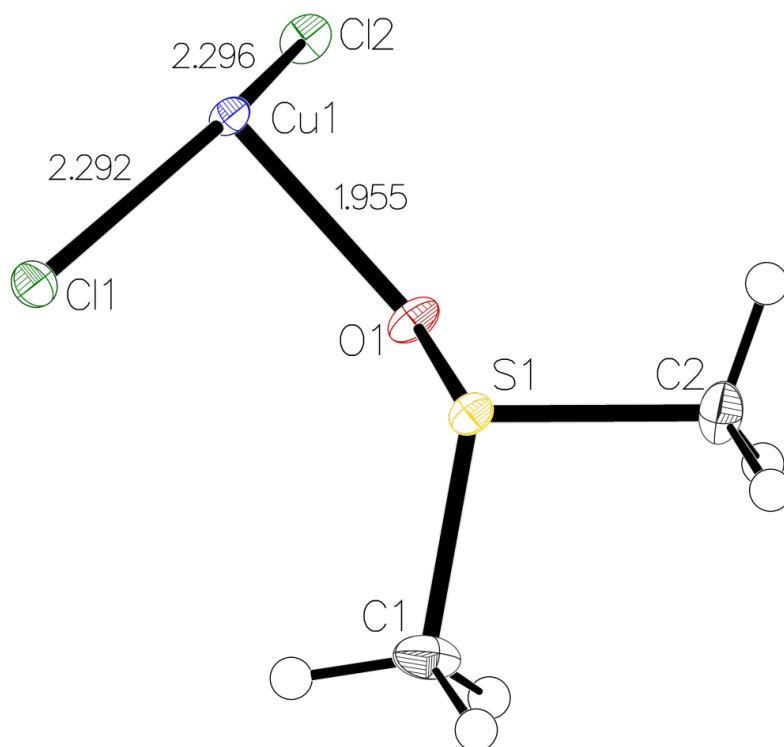

**Figure 1** Asymmetric Unit [Cu4M1] drawn with 50% displacement ellipsoid. The bond precision for C-C single bonds is 0.0014Å. More detailed information about the coordination geometry of the Copper can be found in table [Table6].

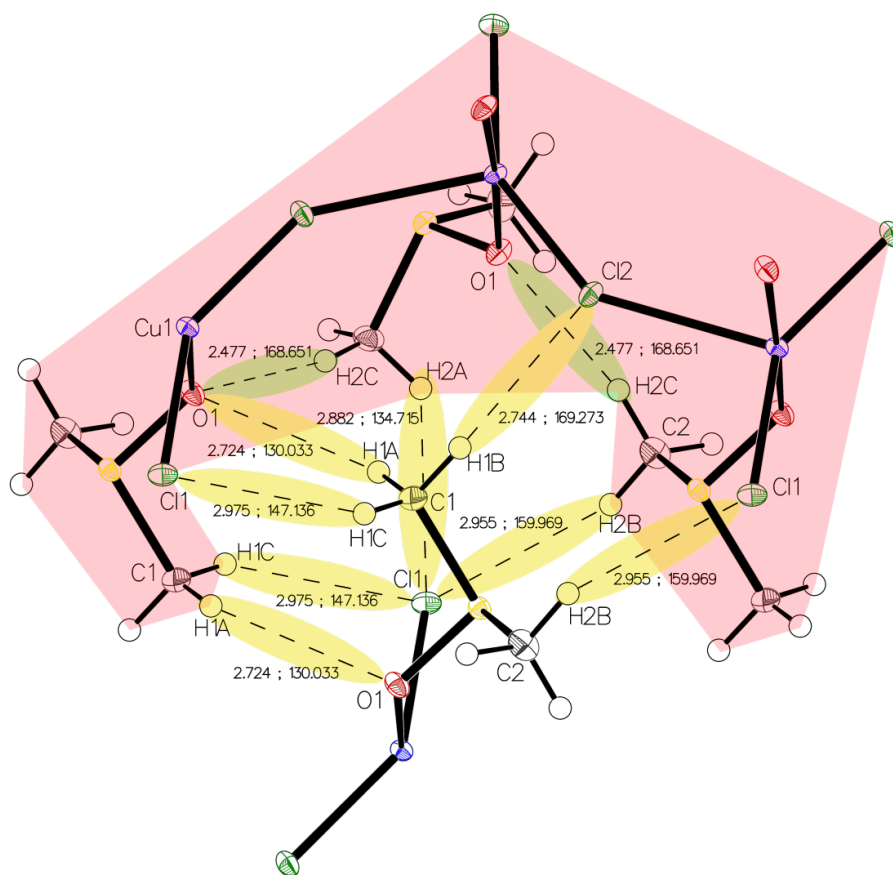

**Figure 2** In this packing, it stands out that the connections with chlorine on the copper form one dimensional linear chain and result in a (red marked) "cap". In the area marked in red, two other intramolecular bonds have also been detected (green shaded). The cap encloses a neighbouring strain and it is characterised by several intermolecular interactions (yellow shaded). In addition to the bond lengths [Å] of the inter- and intramolecular bonds, the bond angles [°] are also given.

**Table 2** Sample and crystal data. [Cu4M1]

|                                 |                                                                                |                          |            |                                            |                 |
|---------------------------------|--------------------------------------------------------------------------------|--------------------------|------------|--------------------------------------------|-----------------|
| Radiation [Å]                   | MoK $\alpha$ ( $\lambda = 0.71073$ )                                           | Z                        | 4          | Measurement method                         | \f and \w scans |
| Crystal habit                   | clear blue block                                                               | a [Å]                    | 7.9376(3)  |                                            |                 |
| Crystal size [mm <sup>3</sup> ] | 0.2 × 0.2 × 0.15                                                               | b [Å]                    | 11.4925(4) | Abs. correction type                       | multiscan       |
| Empirical formula               | C <sub>4</sub> H <sub>12</sub> Cl <sub>2</sub> CuO <sub>2</sub> S <sub>2</sub> | c [Å]                    | 11.3612(4) | Abs. correction Tmin                       | 0.2120          |
| Formula weight [g/mol]          | 290.70                                                                         | $\alpha$ [°]             | 90         | Abs. correction Tmax                       | 0.2650          |
| Temperature [K]                 | 100.0                                                                          | $\beta$ [°]              | 90         | Density (calculated) [g/cm <sup>3</sup> ]  | 1.863           |
| Crystal system                  | Orthorhombic                                                                   | $\gamma$ [°]             | 90         | Absorption coefficient [mm <sup>-1</sup> ] | 2.979           |
| Space group                     | Pnma                                                                           | Volume [Å <sup>3</sup> ] | 1036.40(6) | F (000) [e]                                | 588.0           |

**Table 3** Data collection and structure refinement. [Cu4M1]

|                                          |                 |                    |                              |                                                       |                            |
|------------------------------------------|-----------------|--------------------|------------------------------|-------------------------------------------------------|----------------------------|
| 2 $\theta$ range for data collection [°] | 5.042 to 60.106 | Index ranges       |                              | Goodness-of-fit on $F^2$                              | 1.093                      |
| Reflections collected                    | 6336            | h                  | -11 ≤ h ≤ 9                  | Diff. peak and hole [e <sup>-</sup> Å <sup>-3</sup> ] | 0.43/-0.57                 |
| Data / restraints / parameters           | 1587/0/57       | k                  | -14 ≤ k ≤ 16                 |                                                       |                            |
| Refinement method                        | Direct Methods  | l                  | -16 ≤ l ≤ 13                 | Function minimized                                    | $\sum w (F_o^2 - F_c^2)^2$ |
|                                          |                 | all data           | R1 = 0.0223,<br>wR2 = 0.0495 | Weighting scheme                                      | where                      |
|                                          |                 | l > 2 $\sigma$ (l) | R1 = 0.0199,<br>wR2 = 0.0486 | $w=1/[\sigma^2(F_o^2) + (0.0212P)^2 + 0.3233P]$       | $P=(F_o^2+2F_c^2)/3$       |

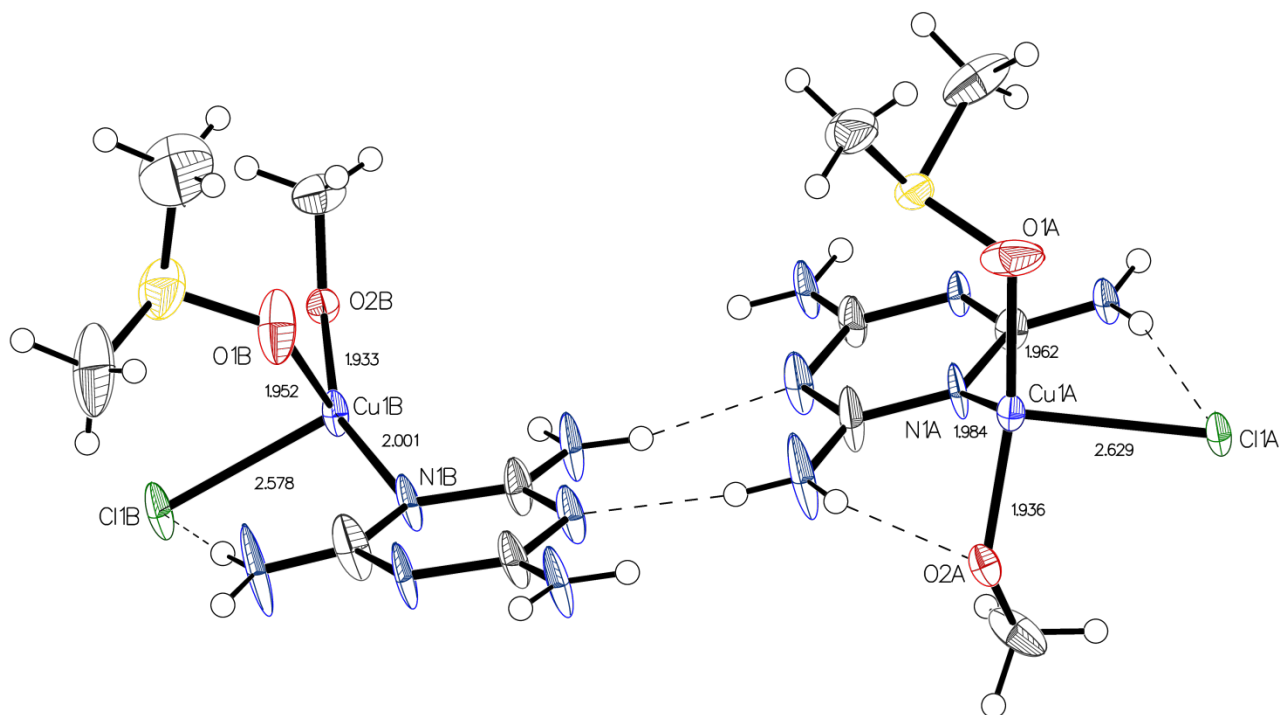

**Figure 3** Crystal structure **[Cu2M1]** drawn with 50% displacement ellipsoid. The bond precision for C-C single bonds is 0.0070Å. Main residue disorder is 12%. Squeeze was used because of high degree of disorder in the co-crystallized solvent. Here, the hydrogen bonds between two independent molecules are visualized by stippled lines at the nitrogen's. Also the intramolecular interactions from Nitrogen to Chloride and Nitrogen to Oxygen are visualized in the same way. More detailed information about the coordination geometry of the Copper can be found in table **[Table6]**. The platon report picks out A and B Alerts of PLAT213. This is related to a fact that is visible in the figure. The big ratio of the ADP's between the different axes, especially the value of the perpendicular elongation to the aromatic plane of the coordinated melamine is unusual high. The good overall measurement quality of the crystal excludes artificial effects. It seems that the strong perpendicular elongation to the aromatic plane is real characteristic of the structure and the A and B Alerts must be interpreted in that way. The interpretation of continuous disorder is based on the experience during the refinement that two or more different separated positions of the melamine ligand could not be realised in a stable way. A similar system with melamine ligands is already reported on the CCDC 134810. The behaviour of the ADP's on the melamine was ordinary and not asymmetric like pictured above.

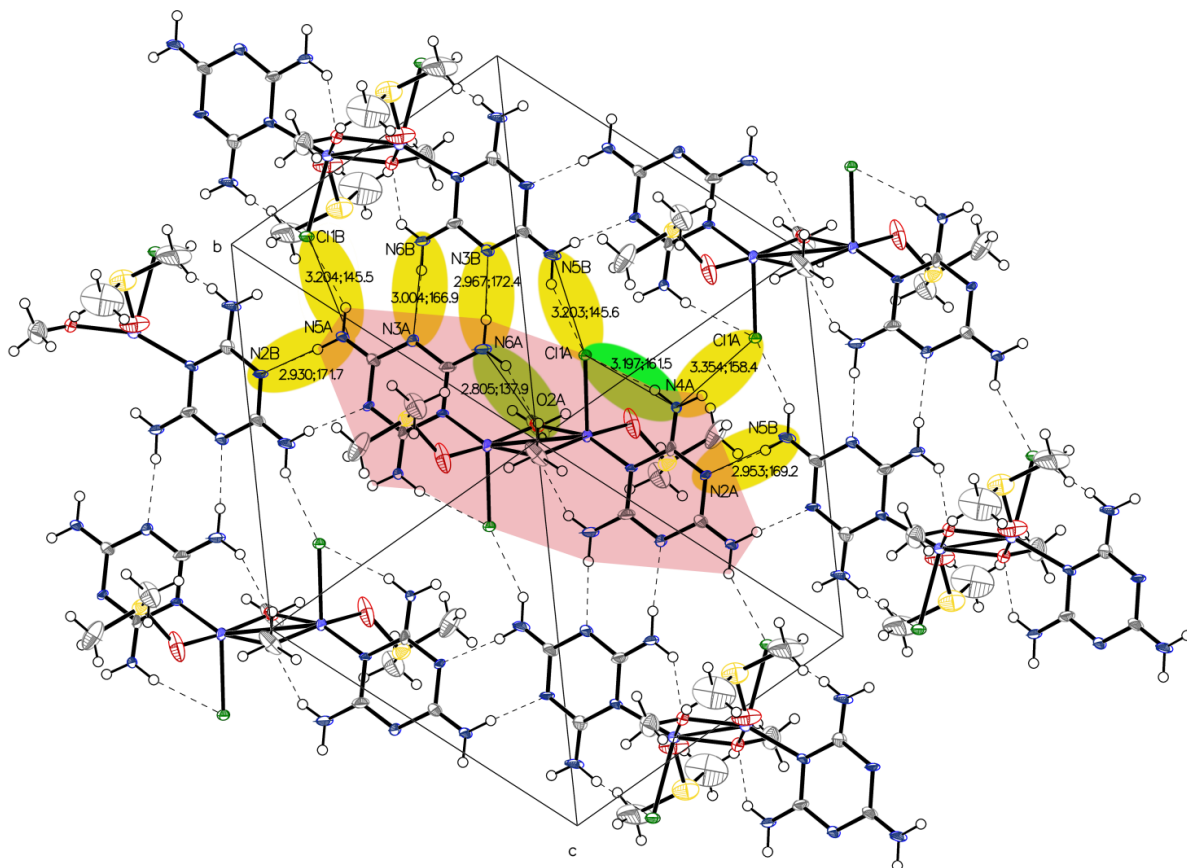

**Figure 4** Packing view along 1 1 1 shows that every dimer (red) is surrounded by six neighbouring dimers in the plane. The plane is characterised by intermolecular interactions (yellow). Also two intramolecular interactions visualized (green).

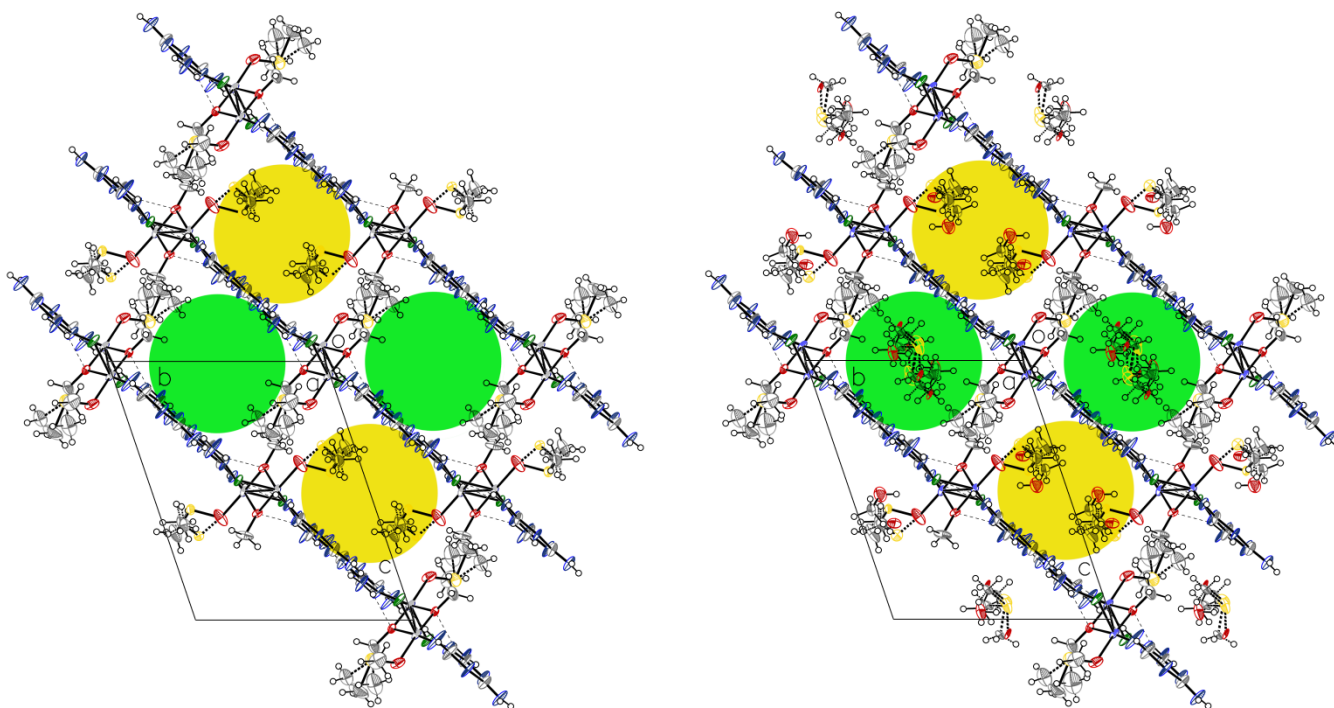

**Figure 5** Packing along 1 0 0 makes solvent accessible voids visible. At the left hand the squeezed model without co-crystallised solvents and on the right side a solvent filled model is pictured. Two different types of similar sized voids could be detected. The green shaded void is along the visible radius almost not sterically influenced. Because of this two different types of solvents (DMSO and MeOH) used during the synthesis co-crystallised in this void in a disordered way. The second type of void (yellow) is influenced by the coordinated DMSO and limits the available space. Only MeOH can be modelled. The final model on the CCDC did not contain any free solvent. The strong necessary use of constrains and restrains to fix solvent atom positions made the use of squeeze more serious.

**Table 4** Sample and crystal data. [Cu2M1]

|                                 |                                      |                          |             |                                            |                 |
|---------------------------------|--------------------------------------|--------------------------|-------------|--------------------------------------------|-----------------|
| Radiation [Å]                   | MoK $\alpha$ ( $\lambda = 0.71073$ ) | Z                        | 4           | Measurement method                         | \f and \w scans |
| Crystal habit                   | clear green block                    | a [Å]                    | 10.4677(14) |                                            |                 |
| Crystal size [mm <sup>3</sup> ] | 0.05 × 0.04 × 0.04                   | b [Å]                    | 11.580(2)   | Abs. correction type                       | multiscan       |
| Empirical formula               | C6H15ClCuN6O2S                       | c [Å]                    | 14.375(3)   | Abs. correction Tmin                       | 0.2319          |
| Formula weight [g/mol]          | 334.29                               | $\alpha$ [°]             | 106.116(8)  | Abs. correction Tmax                       | 0.2650          |
| Temperature [K]                 | 100.0                                | $\beta$ [°]              | 99.250(8)   | Density (calculated) [g/cm <sup>3</sup> ]  | 1.395           |
| Crystal system                  | Triclinic                            | $\gamma$ [°]             | 102.092(8)  | Absorption coefficient [mm <sup>-1</sup> ] | 1.671           |
| Space group                     | P-1                                  | Volume [Å <sup>3</sup> ] | 1591.8(5)   | F (000) [e <sup>-</sup> ]                  | 684.0           |

**Table 5** Data collection and structure refinement. [Cu2M1]

|                                          |                   |                    |                              |                                                       |                            |
|------------------------------------------|-------------------|--------------------|------------------------------|-------------------------------------------------------|----------------------------|
| 2 $\theta$ range for data collection [°] | 4.026 to 50.684   | Index ranges       |                              | Goodness-of-fit on F <sup>2</sup>                     | 1.103                      |
| Reflections collected                    | 27969             | h                  | -12 ≤ h ≤ 12                 | Diff. peak and hole [e <sup>-</sup> Å <sup>-3</sup> ] | 1.36/-1.24                 |
| Data / restraints / parameters           | 5796/259/329      | k                  | -13 ≤ k ≤ 13                 |                                                       |                            |
| Refinement method                        | Intrinsic Phasing | l                  | -17 ≤ l ≤ 17                 | Function minimized                                    | $\sum w (F_o^2 - F_c^2)^2$ |
|                                          |                   | all data           | R1 = 0.0616,<br>wR2 = 0.1349 | Weighting scheme                                      | where                      |
|                                          |                   | l > 2 $\sigma$ (l) | R1 = 0.0499,<br>wR2 = 0.1295 | $w = 1/[\sigma^2(F_o^2) + (0.0644P)^2 + 3.8284P]$     | $P = (F_o^2 + 2F_c^2)/3$   |

**Table 6** Data mining at the CCDC for similar structure types of Cu2M1, top table, & Cu4M1, bottom table, of trigonal bipyramid's or square pyramid's with similar ligand sphere can only show a possible range of metal-metal interaction and the influence on the connecting oxygen to the manifestation of Tau, the used parameter to determine the ratio between trigonal bipyramid or square pyramid. Final conclusion is that the main geometry seems to be the square pyramid (convergence to 0). A real rule for Cu2M1 similar and Cu4M1 similar compounds cannot be fixed.

| CCDC          | Tau-value* | Coordination-partner  | Interaction metal-metal | Angle Cu-O-Cu                    |
|---------------|------------|-----------------------|-------------------------|----------------------------------|
| 2061868 (CuA) | 0.12       | -O, -O, -O, -N, -Cl   | Cu(1A)-Cu(1A) = 3.0122  | Cu(1A)-O(2A)-Cu(1A) = 102.73(13) |
| 2061868 (CuB) | 0.19       | -O, -O, -O, -N, -Cl   | Cu(1B)-Cu(1B) = 3.0050  | Cu(1B)-O(2B)-Cu(1B) = 102.14(16) |
| 1429521       | 0.23       | -O, -O, -O, -N, -N    | Cu-Cu = 2.9962          | Cu-O(2)-Cu = 102.27(12)          |
| 740504        | 0.13       | -O, -O, -O, -N, -Cl   | Cu-Cu = 3.0354          | Cu-O(2)-Cu = 103.72(8)           |
| 740503        | 0.12       | -O, -O, -O, -N, -Cl   | Cu-Cu = 3.0434          | Cu(1)-O(1)-Cu(1) = 103.76(5)     |
| 1935842 (Cu1) | 0.35       | -O, -O, -O, -N, -Cl   | Cu(1)-Cu(2) = 3.0122    | Cu(1)-O(26)-Cu(2) = 99.76(6)     |
| 1935842 (Cu2) | 0.21       | -O, -O, -N, -Cl, -Cl  | Cu(1)-Cu(2) = 3.0122    | Cu(1)-O(15)-Cu(2) = 102.99(6)    |
| 890384 (Cu1)  | 0.42       | -O, -N, -Cl, -Cl, -Cl | Cu(1)-Cu(2) = 2.9356    | Cu(1)-O(1)-Cu(2) = 97.44 (7)     |
| 890384 (Cu2)  | 0.26       | -O, -N, -Cl, -Cl, -Cl | Cu(1)-Cu(2) = 2.9357    | Cu(1)-O(1)-Cu(2) = 97.44 (7)     |
| 2061869       | 0.45       | -O, -O, -Cl, -Cl, -Cl |                         |                                  |
| 1576053       | 0.18       | -O, -N, -Cl, -Cl, -Cl |                         |                                  |
| 1576054       | 0.35       | -O, -N, -Cl, -Cl, -Cl |                         |                                  |
| 1576055       | 0.05       | -O, -N, -Cl, -Cl, -Cl |                         |                                  |
| 602083 (Cu3)  | 0.21       | -O, -O, -N, -Br, -Br  |                         |                                  |
| 1935841       | 0.21       | -O, -N, -N, -N, -Cl   |                         |                                  |
| 1429519       | 0.55       | -O, -O, -N, -N, -Cl   |                         |                                  |
| 602083 (Cu1)  | 0.1        | -O, -O, -O, -N, -Br   |                         |                                  |
| 602083 (Cu2)  | 0.09       | -O, -O, -O, -N, -Br   |                         |                                  |

Tau-value\* = Tau-Descriptor for 5-Coordination<sup>viii</sup>

---

<sup>i</sup> Bruker SAINT v8.38B Copyright © 2005-2019 Bruker AXS

<sup>ii</sup> Sheldrick, G. M. (1996). *SADABS*. University of Göttingen, Germany.

<sup>iii</sup> Dolomanov, O.V., Bourhis, L.J., Gildea, R.J, Howard, J.A.K. & Puschmann, H. , *OLEX2*, (2009), *J. Appl. Cryst.* 42, 339-341

<sup>iv</sup> C. B. Hübenschle, G. M. Sheldrick and B. Dittrich, *ShelXle: a Qt graphical user interface for SHELXL*, *J. Appl. Cryst.*, 44, (2011) 1281-1284

<sup>v</sup> Sheldrick, G. M. (2015). *SHELXS v 2016/4* University of Göttingen, Germany.

<sup>vi</sup> Sheldrick, G. M. (2015). *SHELXL v 2016/4* University of Göttingen, Germany.

<sup>vii</sup> A. L. Spek, *Acta Cryst.* 2009, D65, 148-155

<sup>viii</sup> A.W.Addison,T.N.Rao,J.Reedijk,J.van Rijn,G.C.Verschoor, *J.Chem.Soc.Dalton Trans.*(1984),1349-1356
